## Electrocardiographic characteristics and associated outcomes in patients with Takotsubo syndrome. Insights from the RETAKO registry

I. Martin-Demiguel<sup>1</sup>, I. Nunez-Gil<sup>2</sup>, A. Perez-Castellanos<sup>3</sup>, O. Vedia<sup>2</sup>, A. Uribarri<sup>4</sup>, A. Duran-Cambra<sup>5</sup>, A. Martin-Garcia<sup>6</sup>, M. Corbi-Pascual<sup>7</sup>, M. Guillen Marzo<sup>8</sup>, M. Martinez-Selles<sup>1</sup>

<sup>1</sup>University Hospital Gregorio Maranon, Cardiology, Madrid, Spain; <sup>2</sup>Hospital Clinico San Carlos, Cardiology, Madrid, Spain; <sup>3</sup>Manacor Hospital, Cardiology, Manacor, Spain; <sup>4</sup>University Hospital Clinic of Valladolid, Cardiology, Valladolid, Spain; <sup>5</sup>Hospital de la Santa Creu i Sant Pau, Cardiology, Barcelona, Spain; <sup>6</sup>Clinical University Hospital of Salamanca, Cardiology, Salamanca, Spain; <sup>7</sup>Albacete University Hospital, Cardiology, Albacete, Spain; <sup>8</sup>University Hospital of Taragona Joan XXIII, Cardiology, Tarragona, Spain

On behalf of RETAKO Investigators

**Funding Acknowledgement:** Type of funding source: None

**Background:** Our aim was to describe the prevalence and prognostic significance of electrocardiographic features in patients with Takotsubo syndrome (TTS).

**Methods:** Our data come from the Spanish Multicenter REgistry of TAKotsubo syndrome (RETAKO). All patients with complete electrocardiogram were included.

**Results:** 246 patients were studied, mean age was 71.3±11.5 and 215 (87.4%) were women. ST-segment elevation was seen in 143 patients (59.1%) and was present in ≥2 wall leads in 97 (39.8%). Exclusive elevation in inferior leads was infrequent (5 - 2.0%). After 48 hours, 198 patients (88.0%) developed negative T-waves in a median of 8 leads with a mean amplitude of 0.7±0.5 mV. Mean corrected QT interval was 520±72

ms and it was independently associated with the primary endpoint of all-cause death and nonfatal cardiovascular events (p=0.002) and all-cause death (p=0.008). A higher heart rate at admission was also an independent predictor of the primary endpoint (p=0.001) and of developing acute pulmonary edema (p=0.04). ST-segment elevation with reciprocal depression was an independent predictor of all-cause death (p=0.04). Absence of ST-segment deviation was a protective factor (p=0.005) for the primary endpoint. Arrhythmias were independently associated with cardiogenic shock (p<0.001).

**Conclusion:** Prolonged corrected QT interval, arrhythmia, heart rate at admission and broader repolarization alterations are associated with a poor outcome in TTS.

Independent predictors of outcomes

|                                                 | OR (95% CI)      | P      |
|-------------------------------------------------|------------------|--------|
| Primary endpoint                                |                  |        |
| Heart rate*                                     | 1.1 (1.02–1.1)   | 0.001  |
| Negative T-wave aVR†                            | 0.2 (0.1–0.7)    | 0.007  |
| Corrected QT*                                   | 1.0 (1.00–1.02)  | 0.002  |
| Normal ST-segment*                              | 0.06 (0.01–0.4)  | 0.005  |
| Cardiogenic shock                               |                  |        |
| Arrhythmia development                          | 7.4 (2.8–19.5)   | <0.001 |
| Acute pulmonary edema                           |                  |        |
| Smoker                                          | 2.9 (1.1–7.6)    | 0.03   |
| Heart rate*                                     | 1.0 (1.00–1.1)   | 0.04   |
| Sinus rhythm                                    | 0.1 (0.01–1.4)   | 0.09   |
| All-cause death                                 |                  |        |
| Corrected QT*                                   | 1.02 (1.01–1.03) | 0.008  |
| ST-segment elevation and reciprocal depression* | 11.8 (1.2–123.0) | 0.04   |

OR: odds ratio; CI: confidence interval. \*At admission; † after 48h.

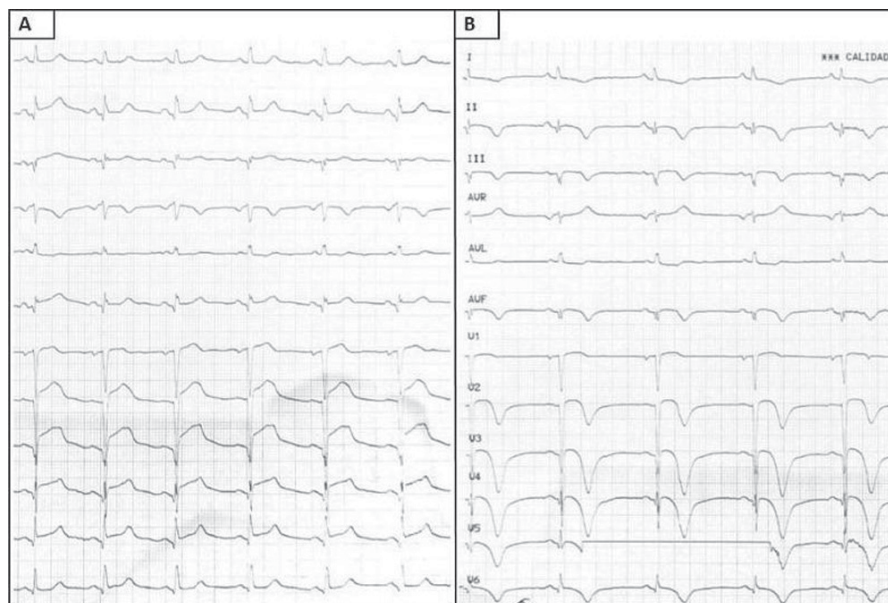

Typical ECG at admission and after 48h.
